# Supplementary material
Source: PubMed Central journal article supplement (PMC4817194)
Supplement: 10.1074_M115.688044_jbc.M115.688044-1.pdf [file 10.1074_M115.688044_jbc.M115.688044-1.pdf]

## Supporting Information

### Characterization of the first $\alpha$ -(1→3) branching sucrases of GH70 family

Marlène Vuillemin<sup>a, b, c</sup>, Marion Claverie<sup>a, b, c</sup>, Yoann Brison<sup>a, b, c</sup>, Etienne Séverac<sup>a, b, c</sup>, Pauline Bondy<sup>a, b, c</sup>, Sandrine Morel<sup>a, b, c</sup>, Pierre Monsan<sup>a, b, c</sup>, Claire Moulis<sup>a, b, c, \*</sup>, Magali Remaud-Siméon<sup>a, b, c, \*</sup>

<sup>a</sup> *Université de Toulouse; INSA, UPS, INP; LISBP, 135 Avenue de Rangueil, F-31077 Toulouse, France*

<sup>b</sup> *CNRS, UMR5504, F-31400 Toulouse, France*

<sup>c</sup> *INRA, UMR792 Ingénierie des Systèmes Biologiques et des Procédés, F-3140 Toulouse, France*

To whom correspondence should be addressed: Dr Claire Moulis ([moulis@insa-toulouse.fr](mailto:moulis@insa-toulouse.fr), Tel +33 (0) 561 559 446 ; Fax +33 (0) 561 559 400) and Prof. Magali Remaud-Siméon ([remaud@insa-toulouse.fr](mailto:remaud@insa-toulouse.fr); Tel +33 (0) 561 559 446 ; Fax +33 (0) 561 559 400)

**Key-words** : Alpha-(1→3) glucosylation, branching sucrose, GH70, glucansucrase, glucooligosaccharides

**Table S1: Ratios and amounts of sucrose and dextran used to synthesize  $\alpha$ -(1→3) branched dextrans**

| Ratio                        | 5.6 | 3   | 1   | 0.5 | 0.25 | 0.1 | 0.05 |
|------------------------------|-----|-----|-----|-----|------|-----|------|
| Sucrose (g L <sup>-1</sup> ) | 170 | 150 | 100 | 50  | 25   | 10  | 5    |
| Dextran (g L <sup>-1</sup> ) | 30  | 50  | 100 | 100 | 100  | 100 | 100  |

**Table S2: Main sequence features of the putative branching sucrases**

| Enzyme | Organism                      | Size <sup>a</sup>    | SP <sup>b</sup> | BRS-A query       |                   |                   | BRS-B query |      |      |
|--------|-------------------------------|----------------------|-----------------|-------------------|-------------------|-------------------|-------------|------|------|
|        |                               |                      |                 | % id <sup>c</sup> | % si <sup>d</sup> | % QC <sup>e</sup> | % id        | % si | % QC |
| BRS-C  | <i>Ln. fallax</i><br>KCTC3537 | 1774 aa<br>197.1 kDa | Yes             | 49%               | 64%               | 99%               | 54%         | 69%  | 99%  |
| BRS-D  | <i>Lb. kunkei</i><br>EFB6     | 1463 aa<br>163.6 kDa | No              | 56%               | 70%               | 69%               | 50%         | 63%  | 69%  |

<sup>a</sup> The size is given in amino acids (aa) and in kDa

<sup>b</sup> SP : Signal peptide

<sup>c</sup> %id : percentage of identity  
<sup>d</sup> %si : percentage of similarity  
<sup>e</sup> QC : Query coverage

**Table S3.** Expression system (vector and expression host) used to produce recombinant branching sucrose (BRS-C and BRS-D) and their production level in *E. coli* cells

|       | Expression system |                              | Production level<br>(U L <sup>-1</sup> of culture) |
|-------|-------------------|------------------------------|----------------------------------------------------|
|       | Vector            | Host                         |                                                    |
| BRS-C | pET-55-DEST       | <i>E. coli</i> BL21 star DE3 | 2000                                               |
| BRS-D | pET28b            | <i>E. coli</i> BL21 star DE3 | 150                                                |

**Table S4.** Reaction on sucrose (292 mM) using BRS-C and BRS-D branching enzymes. Comparison of the production yields.

|       | Leucrose yield | Glucose yield | Small oligosaccharide<br>yield |
|-------|----------------|---------------|--------------------------------|
| BRS-C | 49%            | 44%           | 7%                             |
| BRS-D | 6%             | 76%           | 18%                            |

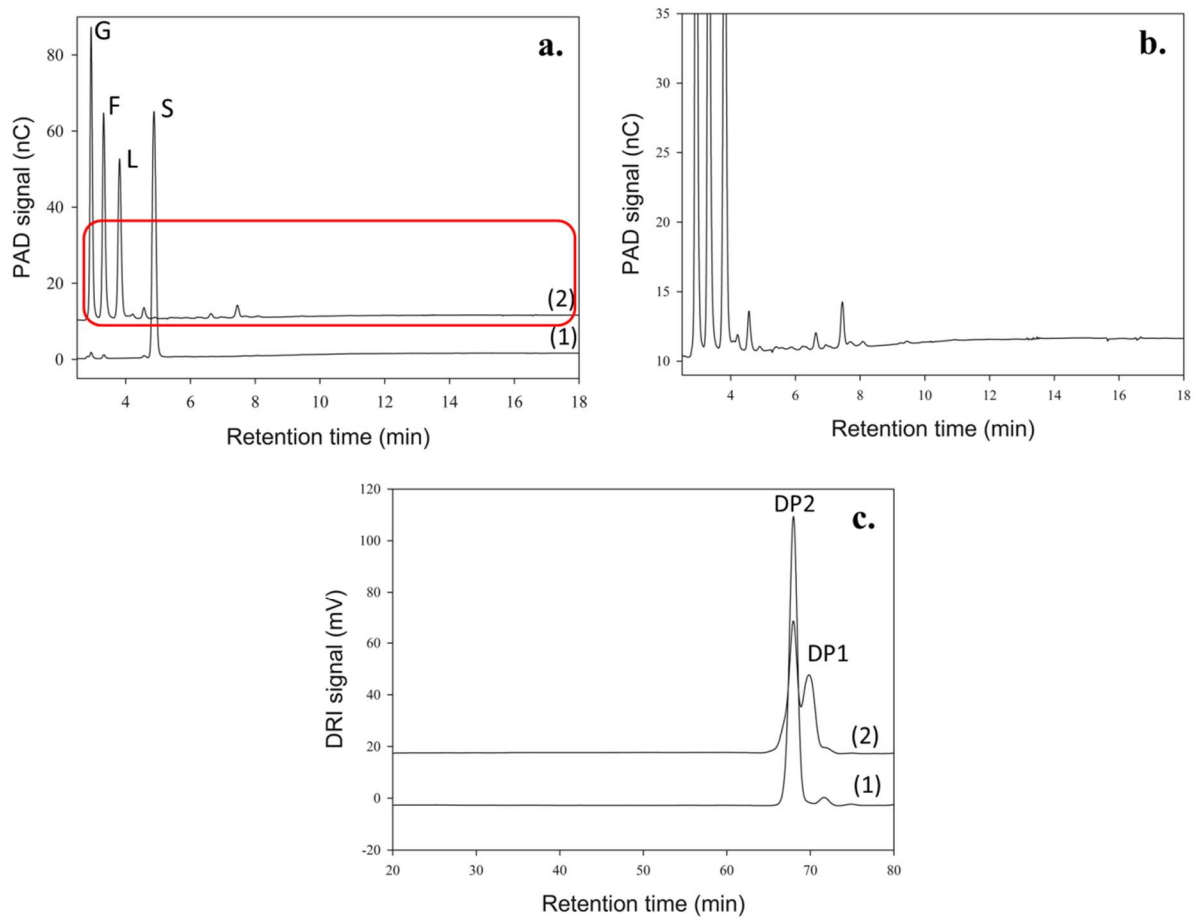

**FIGURE S1. Analysis of the products synthesized using BRS-B enzyme from sucrose (292 mM).** (a) HPAEC-PAD chromatograms of (1) Enzymatic reaction stopped after 1 minute and (2) Enzymatic reaction stopped after 8 hours. G indicates peak corresponding to glucose, F, fructose, L, leucrose and S, sucrose. (b) Enlargement of HPAEC-PAD chromatograms, corresponding to the red frame in the chromatogram (a). (c) HPSEC-RI profile of (1) Enzymatic reaction stopped after 1 minute and (2) Enzymatic reaction stopped after 8 hours. DP1 indicates peak corresponding to monosaccharides (glucose and fructose) and DP2 indicates peak corresponding to disaccharides (sucrose and leucrose).

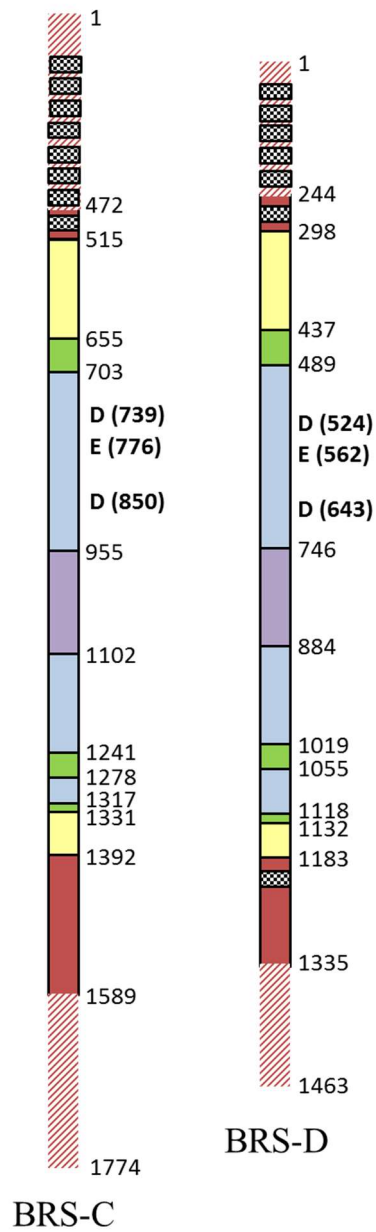

**FIGURE S2.** Schematic organization of the three putative branching sucrases (BRS-C and BRS-D) based on protein sequence alignment with GTF-180-ΔN. Domain V is represented in red, domain IV in yellow, domain B in green, domain A in blue and domain C in purple. Catalytic residues are highlighted in bold and YG repeats are indicated with chequered motifs. Hatched red lines represent zones where no 3D structure information is available for GTF-180-ΔN

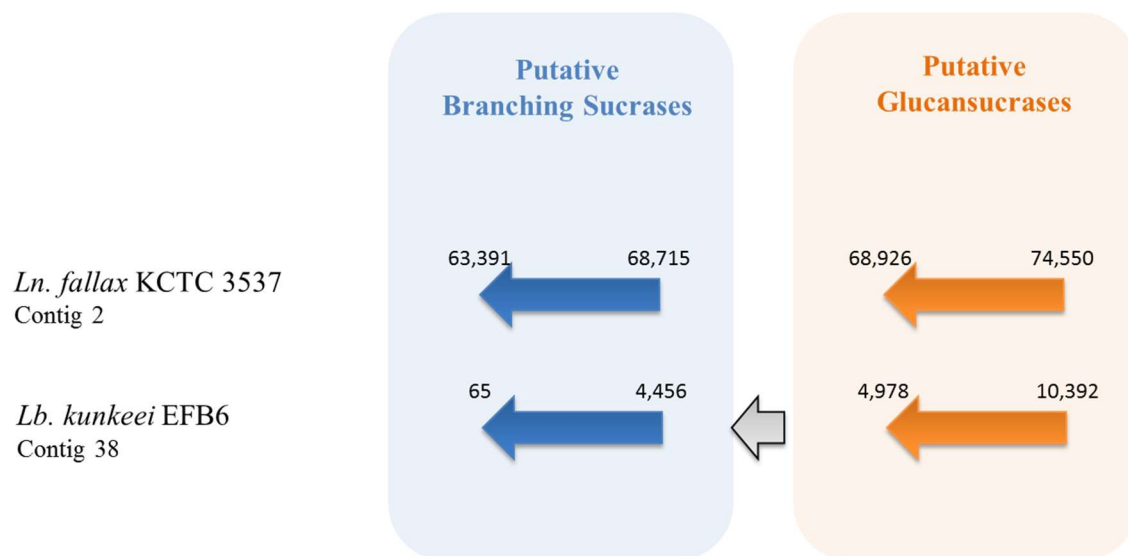

**FIGURE S3.** Representative tandem organization of the three putative branching sucrases (BRS-C and BRS-D) with other putative glucansucrases.
